# Supplementary figures and images for: Low Toxicological Impact of Commercial Pristine Multi-Walled Carbon Nanotubes on the Yeast Saccharomyces cerevisiae
Source: MDPI journal article supplement (doi:10.3390/nano11092272), 2021-09-01

CN800 vs Control

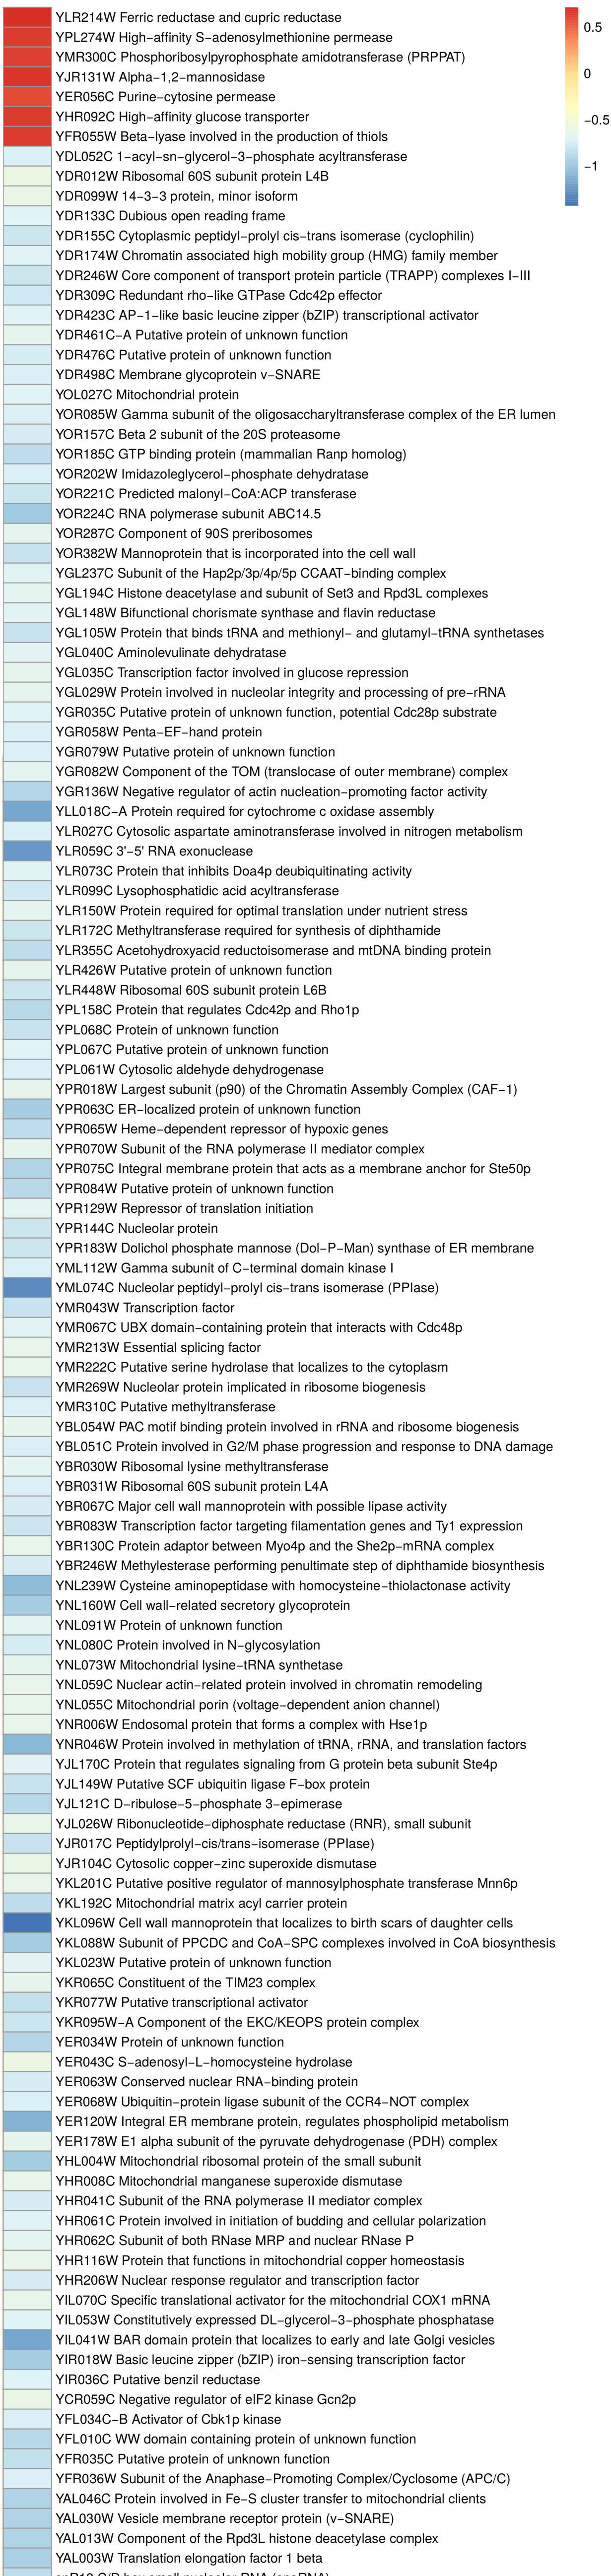

Supplement: s1 [file s1]
